# Supplementary material for: Stromal Cell-SLIT3/Cardiomyocyte-ROBO1 Axis Regulates Pressure Overload-Induced Cardiac Hypertrophy
Source: PubMed Central journal article supplement — Circ Res. 2024 Feb 28;134(7):913–30. doi: 10.1161/CIRCRESAHA.122.321292 (PMC10977056; doi:10.1161/circresaha.122.321292), 2024-02-28
Supplement: res-134-913-s002.pdf [file res-134-913-s002.pdf]

## 1 SUPPLEMENTAL MATERIAL

## 2 MATERIALS AND METHODS

3 Please see the Major Resources Table in the Online Supplemental Materials.

4 **Human studies.** Discarded human right ventricle outflow tract specimens resected from non-syndromic tetralogy  
5 of Fallot patients or left ventricle outflow tract specimens resected from non-syndromic subaortic membrane  
6 patients were collected during clinically indicated cardiac operations. Primary genetic screening results of the  
7 participants including karyotype, fluorescence *in situ* hybridization (FISH), and SNP microarray, were normal.  
8 Control samples were obtained from heart donors who died from noncardiac causes and were nonsuitable for  
9 transplant. The specimens were immediately snap-frozen using liquid nitrogen. Total RNAs were isolated using  
10 standard methods and used for generating cDNA libraries. Deep, paired-end RNA sequencing (RNA-seq) was  
11 performed. Sequencing data were deposited in UCLA CHD-BioCore Genomic Data Repository. *SLIT3* gene  
12 expression (RNA-Seq data) were obtained from UCLA CHD-BioCore Genomic Data Repository (Touma  
13 unpublished data). The data were quantified using RPKB (reads per kilobase of transcript, per million mapped  
14 reads) Measure.

## 16 Experimental Animals

17 Both male and female mice were included in all experiments at a ratio of 1:1. *Slit3* knockout mice (*Slit3*<sup>-/-</sup>)  
18 and their littermates wild type mice (*Slit3*<sup>+/+</sup>) on the CD-1 background were used as previously described <sup>1</sup>. *Robo1*  
19 knockout mice (*Robo1*<sup>-/-</sup>) on the CD-1 background have been described previously <sup>2</sup>. All other mice described  
20 below were on the C57BL/6 (B6) strain. *Slit3*<sup>fl/fl</sup> mice <sup>3</sup> were a gift from Dr. Sun-Kyeong Lee. *Tcf21*-MerCreMer  
21 mice <sup>4</sup> were a gift from Dr. Michelle Tallquist. *Tbx18*-CreERT2 mice <sup>5</sup> have been generated and characterized in  
22 detail previously. *Rosa26*-CreERT2 mice and *Myh6*-MerCreMer mice were purchased from The Jackson  
23 Laboratory (Bar Harbor, ME, USA). *Robo1*<sup>fl/fl</sup> mice were generated by the University of Michigan Transgenic  
24 Animal Model Core. *Robo1*<sup>fl/fl</sup> mice was first created on a B6 SVJ background using an Easi-CRISPR approach  
25 <sup>6</sup> that first deleted exon3 of *Robo1* and then replaced it with a long single stranded DNA donor molecule that was  
26 exon3 flanked by *loxP* sites as well as loci for diagnostic restriction enzymes. These animals then completed six  
27 backcrosses onto the B6 strain prior to use in experiments. At the age of 7 weeks, *Rosa26*-CreERT2, *Slit3*<sup>fl/fl</sup>

28 mice, *Tcf21*-MerCreMer, *Slit3<sup>fl/fl</sup>* mice, *Tbx18*-CreERT2, *Slit3<sup>fl/fl</sup>* mice, and *Myh6*-MerCreMer; *Robo1<sup>fl/fl</sup>* mice were  
29 injected with tamoxifen (100 mg/kg/day) for consecutive 5 days to induce recombination. Littermate mice  
30 containing *Slit3<sup>fl/fl</sup>* or *Robo1<sup>fl/fl</sup>* without the Cre transgene were the controls.

31 Mice were housed in a temperature-controlled environment with 12-hour light/dark cycles where they  
32 received food and water *ad libitum*. All protocols concerning the use of animals were approved by the University  
33 of Michigan.

34 Mice were genotyped by polymerase chain reaction with the following primers: *Slit3<sup>fl/fl</sup>*: Forward primer:  
35 TGTGACTAGCATGTAGTAGG, Reverse primer: CCAGGCTCAGCCTTTTAGAG. *Robo1<sup>fl/fl</sup>*: Forward primer:  
36 AGTAATGGATTCAGTTAGAGTCGGGGTAT, Reverse primer: TCCCGTAGTACTGTAGGGACAAGATTAAG.  
37 *Slit3<sup>-/-</sup>*: Forward primer: GCGCCTCCTCGGGCTCCTCGTGTC, Reverse primer:  
38 TGCGGGGGATGCCCCGAGGAA. *Robo1<sup>-/-</sup>*: Forward primer: TGGCACGAAGGTATATGTGC, Reverse primer:  
39 CCTCCGCAAACCTCCTATTTTC. *Rosa26*-CreERT2: Forward primer: CGTGATCTGCAACTCCAGTC, Reverse  
40 Primer: AGGCAAATTTTGGTGTACGG. *Tbx18*-CreERT2: Forward primer:  
41 GCCAGAGAAAGAGGAAACGGCAA, Reverse primer: TCCCTGAACATGTCCATCAGGTTC. *Tcf21*-  
42 MerCreMer: Forward primer: TTCTCCAGGCTCAAGACCAC, Reverse primer:  
43 CAAACCCTAGCACAAATCACTCGC. *Myh6*-MerCreMer: Forward primer: TCTATTGCACACAGCAATCCA,  
44 Reverse primer: CCAGCATTGTGAGAACAAGG.

## 46 TAC Model

47 Transverse aortic constriction was accomplished using a 27-gauge needle as described elsewhere <sup>7</sup>. Mice  
48 subjected to the same surgical procedures as TAC mice but without being tied at the transverse aorta (sham  
49 mice) were used as the control mice. Animals were randomized to Sham or TAC surgery. Animals with  
50 inadequate gradients (<25 mmHg) on echocardiogram were excluded. We performed a power analysis to  
51 determine the appropriate number of animals in each group. Given our historical measurements (mean±SD) of  
52 these outcomes on control animals, our intention to detect a 20% difference between control and experimental  
53 groups, a probability of Type I error ( $\alpha$ ) of 0.05, and the risk of Type II error ( $\beta$ ) of 0.2, we have determined the  
54 minimum number animals needed for each experiment: n=8 mice/group for HW/BW ratio measurement. Initial

55 group size was at least 11 animals to account for attrition or dropout rate from surgical mortality. Approximately  
56 20% of animals were excluded from the study because of procedure mortality or inadequate TAC gradients.

## 58 **Isolation of Cardiac Cells and Cell Culture**

59 Adult mice cardiac myocytes and nonmyocytes were isolated with Langendorff-free method as previously  
60 published <sup>8</sup>. Briefly, mice aged 6-8 weeks were anesthetized and the heart was exposed via sternotomy. After  
61 transecting the descending aorta, 7 ml EDTA buffer was immediately flushed into the right ventricle within 1  
62 minute. The heart was then transferred to a 60-mm dish containing fresh EDTA buffer. EDTA buffer, perfusion  
63 buffer, and collagenase buffer were injected sequentially into the left ventricle. Cardiac chambers were separated  
64 and gently pulled into 1-mm pieces using forceps. Then the suspension underwent debris dissociation, enzymatic  
65 activity termination, and gravity settling, after which, the fractions containing the cardiomyocytes or cardiac  
66 nonmyocytes were collected separately for further analysis. Adult mice cardiac fibroblasts (AMCFs) were  
67 obtained from the cardiac nonmyocyte fraction that was cultured on polydimethylsiloxane (PDMS)-coated plates  
68 with DMEM supplemented with 10% FBS, 1% penicillin-streptomycin (P/S). AMCFs at passage number 1 or 2  
69 were used. Serum-free media were conditioned with cultured AMCFs with or without adenovirus infection for 48  
70 hours.

71 Neonatal rat cardiomyocytes (NRCMs) were isolated from the ventricles of 2-days-old Sprague–Dawley rats  
72 (Charles River Laboratories, Wilmington, MA, USA) according to the instruction of Pierce™ Primary Cell Isolation  
73 Kits (Invitrogen, 88280). Briefly, neonatal rat ventricles were removed from the chest, minced and rinsed in HBSS  
74 buffer and then digested with the complex enzymes in the 37°C incubator. After 30-35 minutes, digestion was  
75 stopped with FBS addition and then cellular dissociation was completed by gentle trituration. Cells resuspended  
76 were pre-plated for 1.5 hours to remove cardiac fibroblasts. NRCMs were plated at the density of  $1.2 \times 10^5/\text{cm}^2$   
77 on the 1% gelatin-coated plates and cultured in Medium 199 supplemented with 1% ITS, 1% P/S, 10  $\mu\text{M}$  cytosine  
78 1- $\beta$ -d-arabinofuranoside (Ara C) (to inhibit the proliferation of fibroblasts).

79 Primary human aortic vascular smooth muscle cells were purchased from Promocell GmbH (Heidelberg,  
80 Germany) and cultured with Promocell Smooth Muscle Cell Growth Medium 2 with supplement and 1% P/S and  
81 used between passages 2-5. Human induced pluripotent stem cell-derived cardiomyocytes (iPS-CMs)

82 iCell® Cardiomyocytes were purchased from FUJIFILM Cellular Dynamics, Inc. (Madison, WI, USA) and cultured  
83 according to the manufacturer instructions. Cells were periodically assessed for *Mycoplasma* contamination.  
84

### 85 **Echocardiography**

86 Transthoracic echocardiography of mice was performed under anesthesia with 2% isoflurane by the University  
87 of Michigan Physiology Phenotyping Core as previously described <sup>1</sup>. Animals were placed on a warming pad to  
88 maintain normothermia. Two-dimensional, M-mode, Doppler, and tissue Doppler echocardiography images were  
89 recorded using a Visual Sonics Vevo 2100 high-resolution in vivo microimaging system with an MS 550D  
90 transducer that has a center frequency of 40 MHz and a bandwidth of 22–55 MHz with the animal in a supine or  
91 lateral position. Measurements of the end-diastolic and end-systolic interventricular septum, posterior wall  
92 thickness, and LV internal diameter were conducted for each mouse. Then, the LV ejection fraction and fractional  
93 shortening were calculated. Echocardiogram parameters were assessed by a blinded technician.  
94

### 95 **Adenovirus Infection and siRNA Transfection**

96 Adenovirus encoding for either GFP (AdGFP), *SLIT3* (AdSLIT3), or Cre (AdCre) were dissolved in pre-  
97 chilled, serum free media without P/S, and then added to plated cells at the MOI of 50. After 6 hours, media were  
98 changed to the media appropriate for the responding cells. For the knockdown of *SLIT3* in vascular smooth  
99 muscle cells, or the knockdown of *Robo1* in neonatal rat cardiomyocytes, cells were transfected with siRNA-*SLIT3*  
100 or siRNA-*Robo1* or siRNA-Scramble purchased from Origene Technologies, Inc. (Rockville, MD, USA) using  
101 Lipofectamine RNAiMAX (Invitrogen) with the reverse transfection according to the manufacturer's instructions.  
102

### 103 **Western Blot Analysis**

104 Cellular or tissue extracts were lysed in RIPA lysis buffer with the addition of phosphatase inhibitor and  
105 protease inhibitor. Equal amounts of proteins were loaded and separated on 4-12% SDS-PAGE before transfer  
106 to nitrocellulose blotting membranes. After blocked in 5% skimmed milk in TBST at room temperature for 1.5  
107 hours, the membranes were incubated with primary antibodies at 4°C overnight. After TBST washing,  
108 membranes were incubated with fluorescence-conjugated secondary antibodies for 1 hour at room temperature.

109 After TBST washing, bands were scanned and analyzed by Li-Cor Odyssey imaging system (LiCor Bioscience,  
110 Lincoln, NE). The used antibodies are listed: anti-SLIT3 (1:1000, Thermo Fisher Scientific, Waltham, MA, USA),  
111 anti-phosphorylated-PKA substrates (1:1000, Abcam, Cambridge, UK), anti-phosphorylated-AKT (1:1000,  
112 Abcam), anti-total-AKT (1:1000, Abcam), anti-phosphorylated-PKAc (1:1000, Abcam), anti-total-PKAc (1:1000,  
113 Abcam).

## 114

### 115 **qPCR Analysis**

116 Total RNA was extracted from cells or tissue using RNeasy Mini Kit (QIAGEN, Hilden, Germany) followed  
117 by reverse transcription with SuperScript III kit (Thermo Fisher Scientific). mRNA was determined by Real-Time  
118 PCR Detection System (Bio-Rad Laboratories, Hercules, CA) using iQ SYBR Green Supermix (Bio-Rad). The  
119 mRNA level was normalized to the internal control, GAPDH, and presented as the fold change to the control  
120 group. The qPCR primers used in this study are available upon request.

### 121

### 122 **Histological Analysis**

123 After euthanasia, mice were perfused with ice-cold saline through the left ventricle. The hearts were dissected,  
124 fixed in formalin, embedded in paraffin, and sectioned. The H&E staining was performed by the In-Vivo Animal  
125 Core at the University of Michigan. After hydration, antigen retrieval, permeabilization, and blocking, the slices  
126 were stained with anti-SLIT3 (1:100, Sigma Aldrich,), anti-ROBO1 (1:100, Abcam), anti-cTNT (1:100, Sigma-  
127 Aldrich, St. Louis, MO, USA), anti-POSTN (abcam, ab215199, 1:100), anti-Tdtomato (1:100, Abcam) at 4°C  
128 overnight, followed by Alexa Fluor-conjugated secondary antibody (1:100, Thermo Fisher Scientific)  
129 immunostaining. For the cardiomyocyte cross-sectional area analysis, slices were stained with Alexa Fluor488-  
130 conjugated wheat-germ agglutinin (WGA, Sigma Aldrich). The nuclei were stained with DAPI. Images were  
131 obtained with a fluorescence microscope and analyzed. For anti-SLIT3 and anti-ROBO1 antibodies, we utilized  
132 WT and KO tissue as our positive and negative controls, respectively. Secondary-only antibody controls were  
133 also performed with each staining experiment to determine the level of background staining.

134 Picrosirius red staining was used to visualize fibrillar collagen. For the staining, one LV short-axis section at  
135 the level of the mid-lower papillary muscles was selected per heart. For H&E staining, the images of sections were  
136 scanned and analyzed with Keyence BZ-X800 microscopy (Keyence). For staining with picrosirius red (Picro-Sirius

137 Red Stain Kit-Cardiac Muscle, Abcam, ab245887), Heart sections were deparaffinized with xylene and rehydrated  
138 through a graded ethanol series (100, 95, 80, 70 and 50%) at 5-minute intervals, then rinsed in deionized water and  
139 incubated in 0.2% phosphomolybdic acid solution for 2 min. After rinsed in deionized water, the heart tissue was then  
140 incubated with picosirius red solution for 1 hour at room temperature. Afterward, the slide was washed in two changes  
141 of 0.5% acetic acid for a total 30 seconds, then hydrated with two changes of absolute ethanol for 30 seconds each,  
142 cleared in xylene (Fisher Chemical, X5-1) twice for a total 10 min and mounted in synthetic resin (Fisher Chemical ,  
143 SP15) . The finished slides were imaged using the Olympus BX53 microscopy with the same light setting and pixel  
144 classifier. The production of mature fibrillary collagen in the heart tissues was indicated by the mean red channel  
145 signal intensity which was measured with ImageJ software (Version1.8.0).

#### 147 *Hydroxyproline Assay*

148 To quantify the total tissue collagen content, the hydroxyproline assay kit (Hydroxyproline Assay Kit- Perchlorate Free,  
149 Sigma-Aldrich, MAK357) was used according to the manufacturer's protocol. For this assay, 10 mg heart tissues from  
150 the left ventricle near apex per heart were collected, mixing with 100  $\mu$ L of ultrapure water, and thoroughly  
151 homogenized with Epishear probe sonicator (Active Motif).100  $\mu$ L of sample homogenate was then transferred to a  
152 pressure-tight, screw-capped polypropylene vial and added with 100  $\mu$ L of 10 M concentrated NaOH, followed by  
153 incubation at at 120  $^{\circ}$ C for 1 hour. Following alkaline hydrolysis, the vial was placed on ice to cool briefly before  
154 opening cap and mixed with 100  $\mu$ L of 10 M concentrated HCl to neutralize residual NaOH. Then the vials were  
155 centrifuged at 10,000  $\times$  g for 5 minutes to pellet any insoluble debris that may remain following hydrolysis. 10  $\mu$ L of  
156 each neutralized sample hydrolysate supernatants were transferred to 96-well plates, respectively. The samples were  
157 placed in a 65 $^{\circ}$ C oven to be evaporated to dryness. Then 100  $\mu$ L Oxidation Buffer/ Chloramine T mixture (provided in  
158 the kit) was added to each well followed by incubation at room temperature for 20 minutes. Then 50  $\mu$ L of Developer  
159 Solution (provided in the kit) to each reaction well, followed by incubation at 37  $^{\circ}$ C for 5 minutes. Next, 50  $\mu$ L of DMAB  
160 Concentrate solution (provided in the kit) was added to each reaction well, and then the plates were incubated in a  
161 65 $^{\circ}$ C oven for 45 minutes. After incubation, the absorbance of each well was immediately measured at 560 nm with  
162 a spectrophotometer (Multiskan SkyHigh Microplate Spectrophotometer, A51119500C).

#### 164 **Cell Immunofluorescence Staining**

165 Cardiomyocytes were fixed with 4% paraformaldehyde for 15 min and permeabilized with 0.5% Triton X-

166 100 for 10 min. After a preincubation in 3% BSA for 1h, myocytes were incubated with an anti- $\alpha$ -sarcomeric  
167 actinin (1:200, Abcam) at 4°C overnight, followed by Alexa Fluor conjugated secondary antibody or Alexa  
168 Fluor488-conjugated WGA (1:100, Thermo Fisher Scientific). The nuclei were stained with DAPI. Images were  
169 analyzed using ImageJ software.

## 172 **Statistical Analysis**

173 All data are presented as mean  $\pm$  SEM. Statistical significance of genotype, surgery (Sham or TAC), and  
174 their interactions on echocardiography parameters, HW/BW, histological changes, and gene expression were  
175 analyzed for planned comparisons using 2-way ANOVA with Tukey's multiple comparison test. Where  
176 appropriate, the Student's t test or Mann Whitney test were used to compare data between two groups. For  
177 results with  $n \geq 6$ , we have used the D'Agostino-Pearson (omnibus K2) test to confirm normality prior to  
178 comparison with a parametric test. For data  $n < 6$  or data that were  $n \geq 6$  and not normal, we have used a non-  
179 parametric test. A linear regression model with cluster option and robust standard errors was used to analyze  
180 the picosirius red polarized microscopy data. All statistical analyses were performed using GraphPad Prism 9.4.1,  
181 except for the picosirius red polarized microscopy data, which was analyzed using Stata 18.0 (StataCorp LLC,  
182 College Station, TX, USA). A p value less than 0.05 was considered significant. Images selected for the figures  
183 were chosen to most closely represent the average of the experimental findings. The corresponding author (MS)  
184 had full access to all the data in the study and takes responsibility for its integrity and the data analysis.

## 186 **Study Approval**

187 Pediatric patients with clinical diagnosis of a congenital heart defect were enrolled in the Congenital Heart  
188 Defect Bio-banking core (UCLA CHD-BioCore) using a protocol approved by the UCLA Institutional Review  
189 Board (UCLA IRB 13-000646). Written informed consents were obtained from all participants. All animal research  
190 was conducted under protocol #PRO00008538 that was approved by the University of Michigan Institutional  
191 Animal Care and Use Committee.

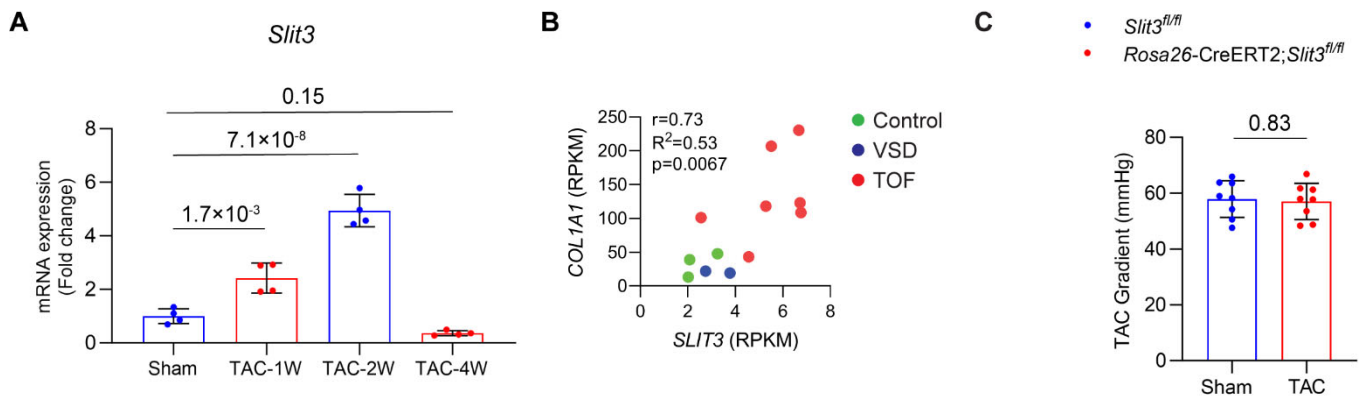

**Supplemental Figure 1. A.** *Slit3* transcription determined by qPCR in wild type mouse hearts after sham surgery or 1, 2, and 4 weeks after TAC. One-way ANOVA with Dunnett's multiple comparisons test. N=4 mice/time point. **B.** Correlation of *COL1A1* and *SLIT3* transcription in myocardial tissue samples from human control hearts, patients with ventricular septal defects (VSDs, a volume overload defect), and tetralogy of Fallot (TOF, a pressure overload defect). **C.** Mean peak pressure gradient of aorta measured by echocardiography at 3 days after TAC surgery in *Slit3<sup>fl/fl</sup>* and *Rosa26-CreERT2; Slit3<sup>fl/fl</sup>* mice. Student's t test and assuming application of the Central Limit Theorem. N=8 mice/group..



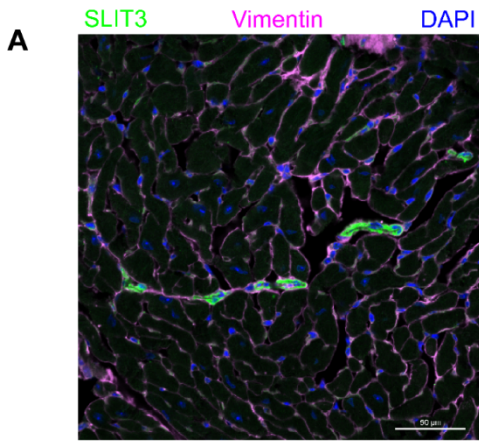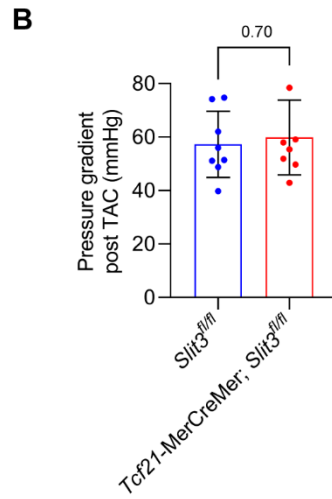

206 **Supplemental Figure 2. A.** Overlay immunofluorescence image of wild type mouse heart stained with anti-  
 207 SLIT3 (green) and anti-vimentin (magenta) antibodies and DAPI nuclear counterstain. Scale bar = 50  $\mu$ m. **B.**  
 208 Mean peak pressure gradient of aorta measured by echocardiography at 3 days after TAC surgery in *Slit3<sup>fl/fl</sup>* and  
 209 *Tcf21-MerCreMer; Slit3<sup>fl/fl</sup>* mice. Student's t-test assuming application of the Central Limit Theorem. N=8  
 210 mice/group. B.  
 211  
 212

213

**A** PDGFRB tdTomato DAPI

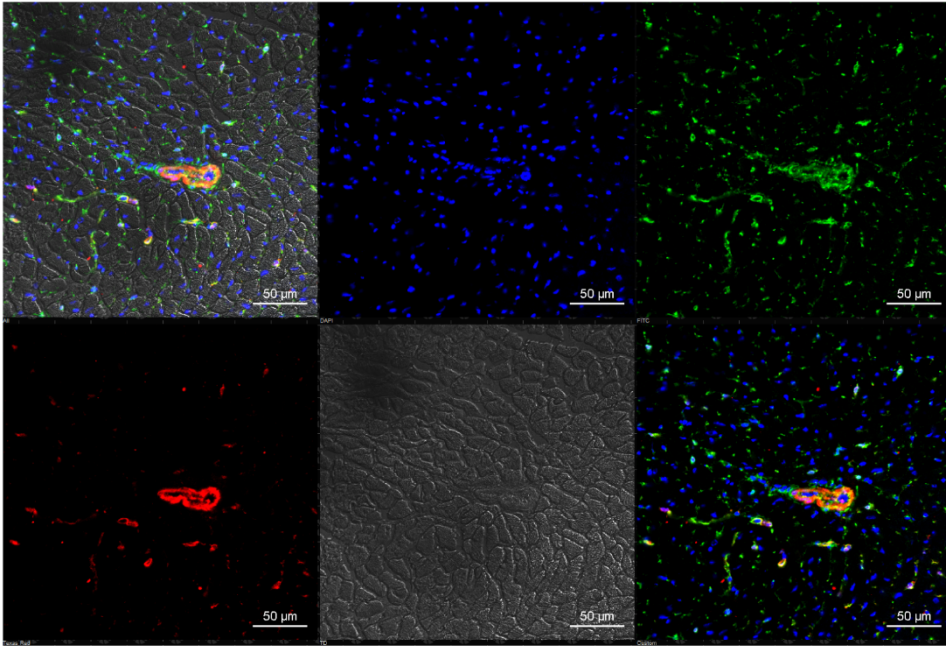

**B** SLIT3 Myh11 tdTomato DAPI

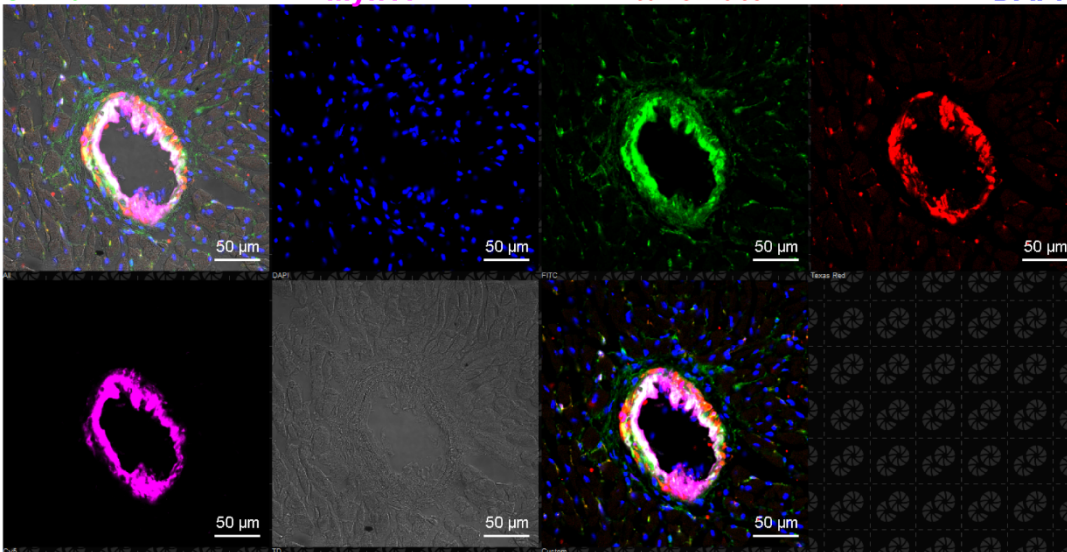

**C** SLIT3 NG2 tdTomato DAPI

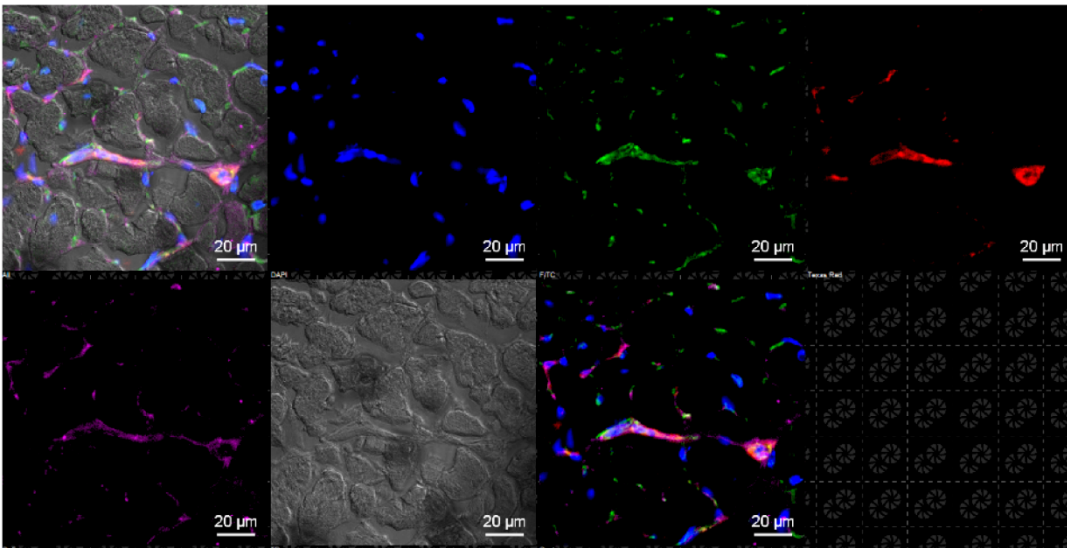

215 **Supplemental Figure 3.** Immunofluorescence staining of myocardial cryosections from *Tbx18-CreERT2*,  
216 *Rosa26-tdTomato* mice, which had been injected with tamoxifen 6 weeks prior. **A.** Immunofluorescence staining  
217 using anti-PDGFR $\alpha$  antibody (green), anti-tdTomato antibody (red), and DAPI (blue); **B.** Immunofluorescence  
218 staining using anti-SLIT3 antibody (green), anti-MYH11 antibody (purple), anti-tdTomato antibody (red), and  
219 DAPI (blue). **C.** Immunofluorescence staining using anti-SLIT3 antibody (green), anti-NG2 antibody (purple),  
220 anti-tdTomato antibody (red), and DAPI (blue).  
221

A

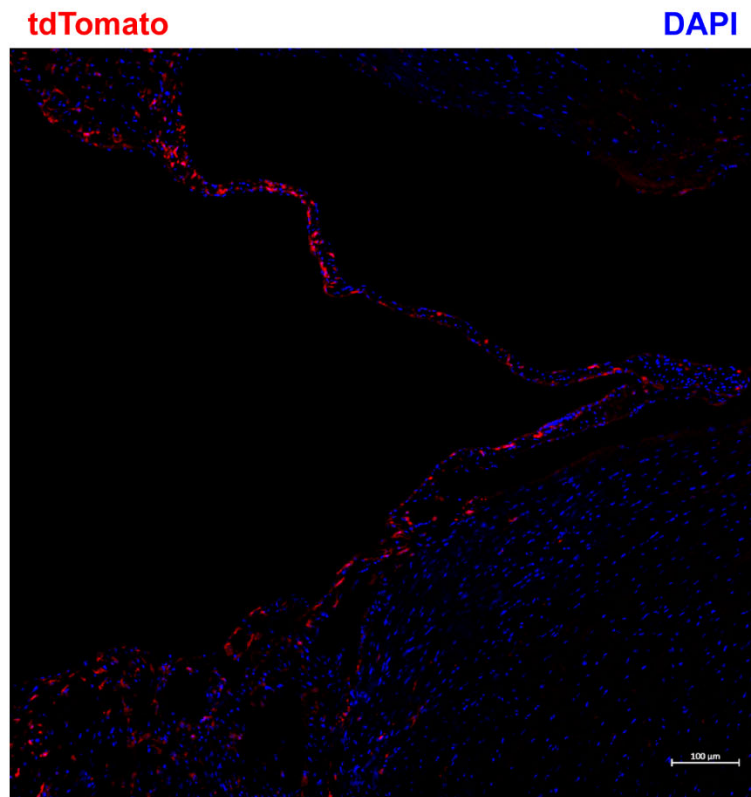

B

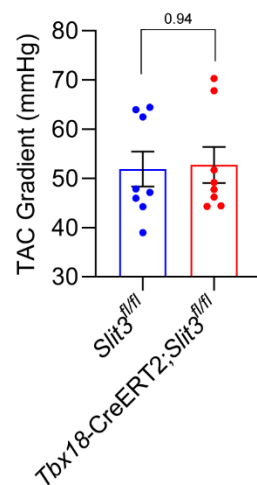

223

224

225

226

227

228

229

**Supplemental Figure 4.** Immunofluorescence staining of myocardial sections from *Tcf21-MerCreMer*; *Rosa26-tdTomato* reporter mice (A), which had been injected with tamoxifen 6 weeks prior. Anti-tdTomato antibody (red) and DAPI (blue). Note tdTomato signal in the interstitial area and valve tissue. Scale bars = 100  $\mu$ m. B. TAC gradient in *Slit3<sup>fl/fl</sup>* and *Tbx18-CreERT2;Slit3<sup>fl/fl</sup>* groups and comparison made with Student's t test assuming application of the Central Limit Theorem.

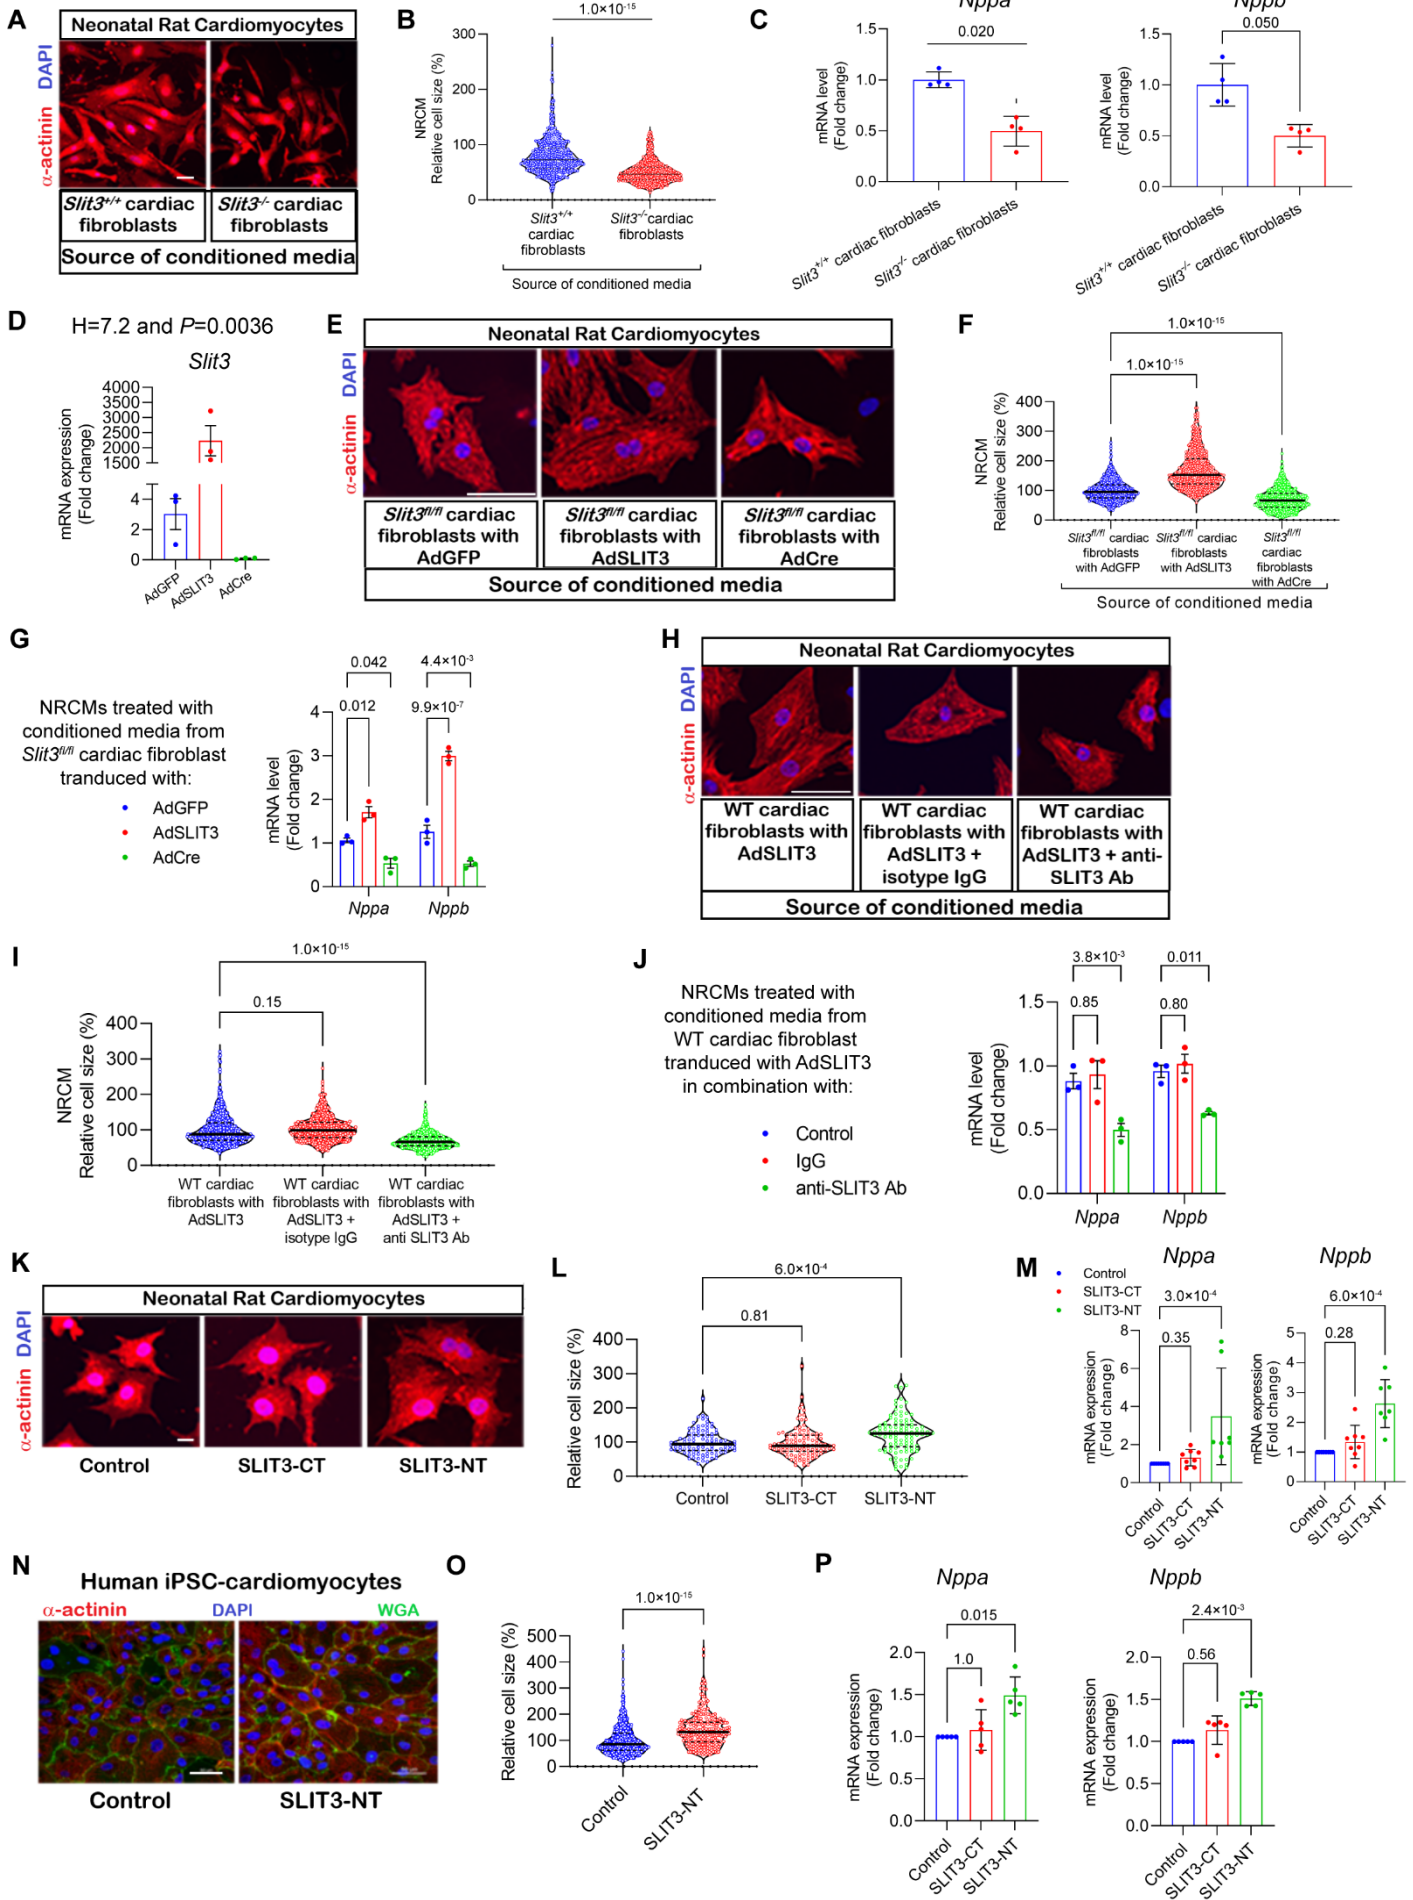

231 **Supplemental Figure 5.** Paracrine-mediated SLIT3 from nonmyocytes can directly induce hypertrophy in  
232 cardiomyocytes. **A.** Immunofluorescence using anti- $\alpha$ -actinin antibody with DAPI counterstain of neonatal rat  
233 cardiomyocytes (NRCMs) that were exposed to conditioned media (CM) generated by culturing cardiac  
234 fibroblasts derived from adult wild type (*Slit3*<sup>+/+</sup>) or *Slit3* knockout (*Slit3*<sup>-/-</sup>) mice. **B.** NRCM size quantification after  
235 being cultured with CM for 72 hours, N=500 cells/group and comparison made with Mann-Whitney test. **C.**  
236 Transcription of hypertrophy-associated genes (*Nppa* and *Nppb*, normalized to *Gapdh* mRNA levels) in NRCMs  
237 were assessed by qPCR after culture with CM for 48 hours. Paired Student's t test. N=3 independent  
238 experiments. **D.** *Slit3* transcript levels (normalized to *Gapdh* mRNA levels) in adult cardiac *Slit3*<sup>fl/fl</sup> fibroblasts  
239 infected with AdGFP, AdSLIT3, or AdCre. Kruskal-Wallis test demonstrated significant differences in *Slit3*  
240 transcription amongst the three groups (H=7.2 and *P*=0.0036). Dunn's multiple comparisons test did not reveal  
241 any significant relationships. N=3 independent experiments. **E.** Immunofluorescence of NRCMs that were  
242 exposed to CM generated by culturing adult cardiac *Slit3*<sup>fl/fl</sup> fibroblasts infected with AdGFP, AdSLIT3, or AdCre.  
243 **F.** NRCM size quantification after being cultured with CM for 72 hours. Kruskal-Wallis test with Dunn's multiple  
244 comparisons test. N=500 cells/group. **G.** Transcription of *Nppa* and *Nppb*, normalized to *Gapdh* mRNA levels,  
245 in NRCMs were assessed by qPCR after culture with CM for 48 hours. Two-way ANOVA with Tukey's multiple  
246 comparisons test. N=3 independent experiments. **H.** Immunofluorescence of NRCMs that were exposed to CM  
247 generated by culturing adult wild type cardiac fibroblasts infected with AdSLIT3 in combination with isotype  
248 control IgG or an anti-SLIT3 antibody. **I.** NRCM size quantification after being cultured with CM for 72 hours.  
249 One-way ANOVA with Dunnett's multiple comparisons test. N=500 cells/group. **J.** Transcription of *Nppa* and  
250 *Nppb*, normalized to *Gapdh* mRNA levels, in NRCMs was assessed by qPCR after culture with CM for 48 hours.  
251 Two-way ANOVA with Tukey's multiple comparisons test. N=3 independent experiments. **K.**  
252 Immunofluorescence of NRCMs that were treated with recombinant SLIT3-C terminal fragment (SLIT3-CT) or  
253 recombinant SLIT3-N terminal fragment (SLIT3-NT). **L.** NRCM size quantification after being cultured for 72  
254 hours. Kruskal-Wallis test and Dunn's multiple comparisons test. N=500 cells/group. **M.** Corresponding  
255 transcription of *Nppa* and *Nppb*. Kruskal-Wallis test and Dunn's multiple comparisons test. N=7 independent  
256 experiments. **N.** Immunofluorescence using WGA, anti- $\alpha$ -actinin antibody and DAPI counterstain of human iPSC-  
257 derived cardiomyocytes that were treated with SLIT3-NT. **O.** Human iPSC-derived cardiomyocyte size  
258 quantification after being cultured for 72 hours. Mann-Whitney test. N=250 cells in each group. **P.** Transcription  
259 of *NPPA* and *NPPB* of human iPSC-derived cardiomyocytes was assessed with qPCR. Kruskal-Wallis test and  
260 Dunn's multiple comparisons test. N=3 independent experiments.



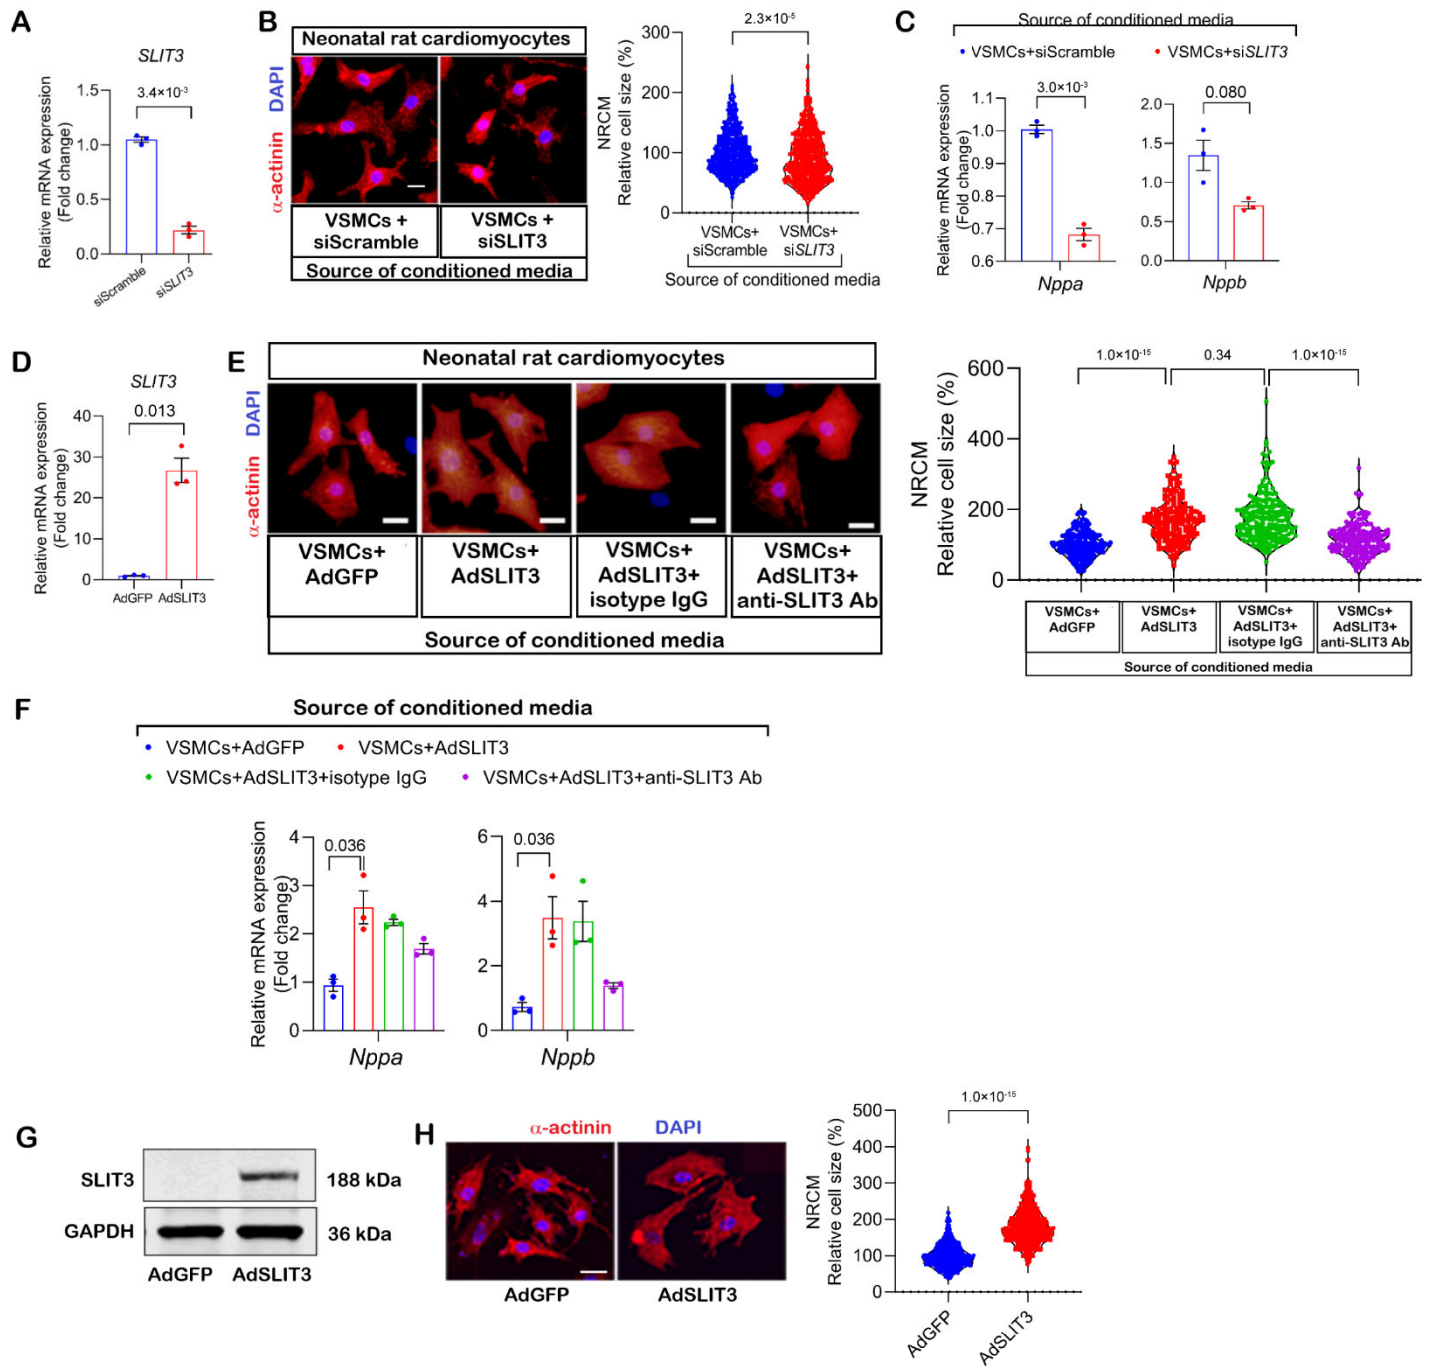

262 **Supplemental Figure 6. A.** *Slit3* transcription in primary human vSMCs transfected with siScramble or siSLIT3  
263 was determined by qPCR and compared by two-tailed student's t test assuming application of the Central Limit  
264 Theorem. Results are from n=3 independent experiments. **B.** Immunofluorescence of NRCMs treated for 72  
265 hours with conditioned media from vSMCs in (A) with anti- $\alpha$ -actinin and DAPI counterstain with cell size  
266 quantification. **C.** qPCR-determined transcription of *Nppa* and *Nppb* in NRCMs treated with conditioned media  
267 from vSMCs from (A) for 48 hours and compared by two-tailed student's t test assuming application of the Central  
268 Limit Theorem. **D.** SLIT3 transcript levels measured by qPCR in primary human vSMCs that were transduced  
269 with AdGFP or AdSLIT3 and compared by paired Student's t test assuming application of the Central Limit  
270 Theorem. **E.** NRCMs were incubated with conditioned media from vSMCs in (D) along with control isotype IgG  
271 or an anti-SLIT3 antibody for 48 hours and immunofluorescence was performed and NRCM cell size was  
272 measured. Kruskal-Wallis test revealed significant differences amongst the four groups ( $H=262$ ,  $P<0.0001$ ) and  
273 Dunn's multiple comparisons test. **F.** Transcription of *Nppa* and *Nppb* in NRCMs treated with conditioned media  
274 and antibodies as in (E) for 48 hours. Kruskal-Wallis test revealed significant differences amongst the four groups  
275 ( $H=9.35$ ,  $P=0.002$ ) and Dunn's multiple comparisons test. **G.** Western blot of SLIT3 protein in NRCMs that were  
276 transduced with AdGFP or AdSLIT3 (MOI of 50). **H.** Immunofluorescence of NRCMs from (G) with cell size  
277 quantification and comparison with Mann-Whitney test. **I.** Transcription of *Nppa* and *Nppb* in NRCMs from (G)  
278 was assessed with qPCR. All results are representative of 3 independent experiments. Cell size quantification  
279 analysis was performed on data from all 3 independent experiments (N=500 cells analyzed/group). Scale bars  
280 = 20  $\mu$ m. **J.** Transcription of *Nppa* and *Nppb* in NRCMs treated with SLIT3-NT (2.5 mg/ml) or phenylephrine (PE,  
281 20  $\mu$ M) for 48 hours. Kruskal-Wallis test revealed significant differences amongst the three groups ( $H=7.448$ ,  
282  $P=0.0036$ )  
283



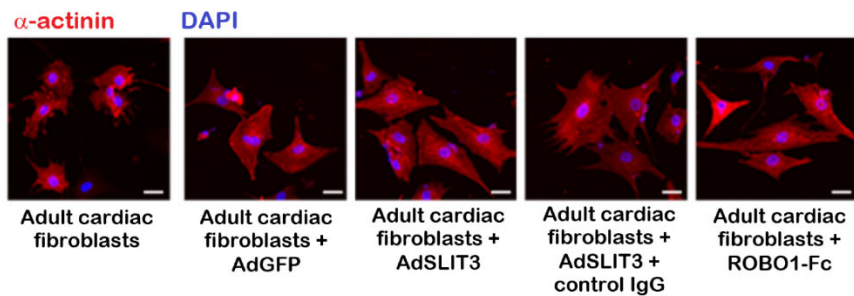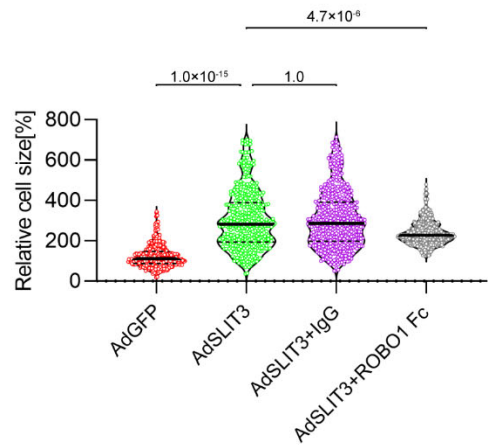

285

286

287

288

289

290

**Supplemental Figure 7. A.** Immunofluorescence with an anti  $\alpha$ -actinin antibody and DAPI counterstain of NRCMs that were treated with conditioned media (from adult wild type cardiac fibroblasts transduced with AdGFP or AdSLIT3) in addition to isotype control IgG or ROBO1-Fc chimeric protein for 72 hours. NRCM cell size was quantified. Kruskal-Wallis test with Dunn's multiple comparisons test. N=500 cells/group.

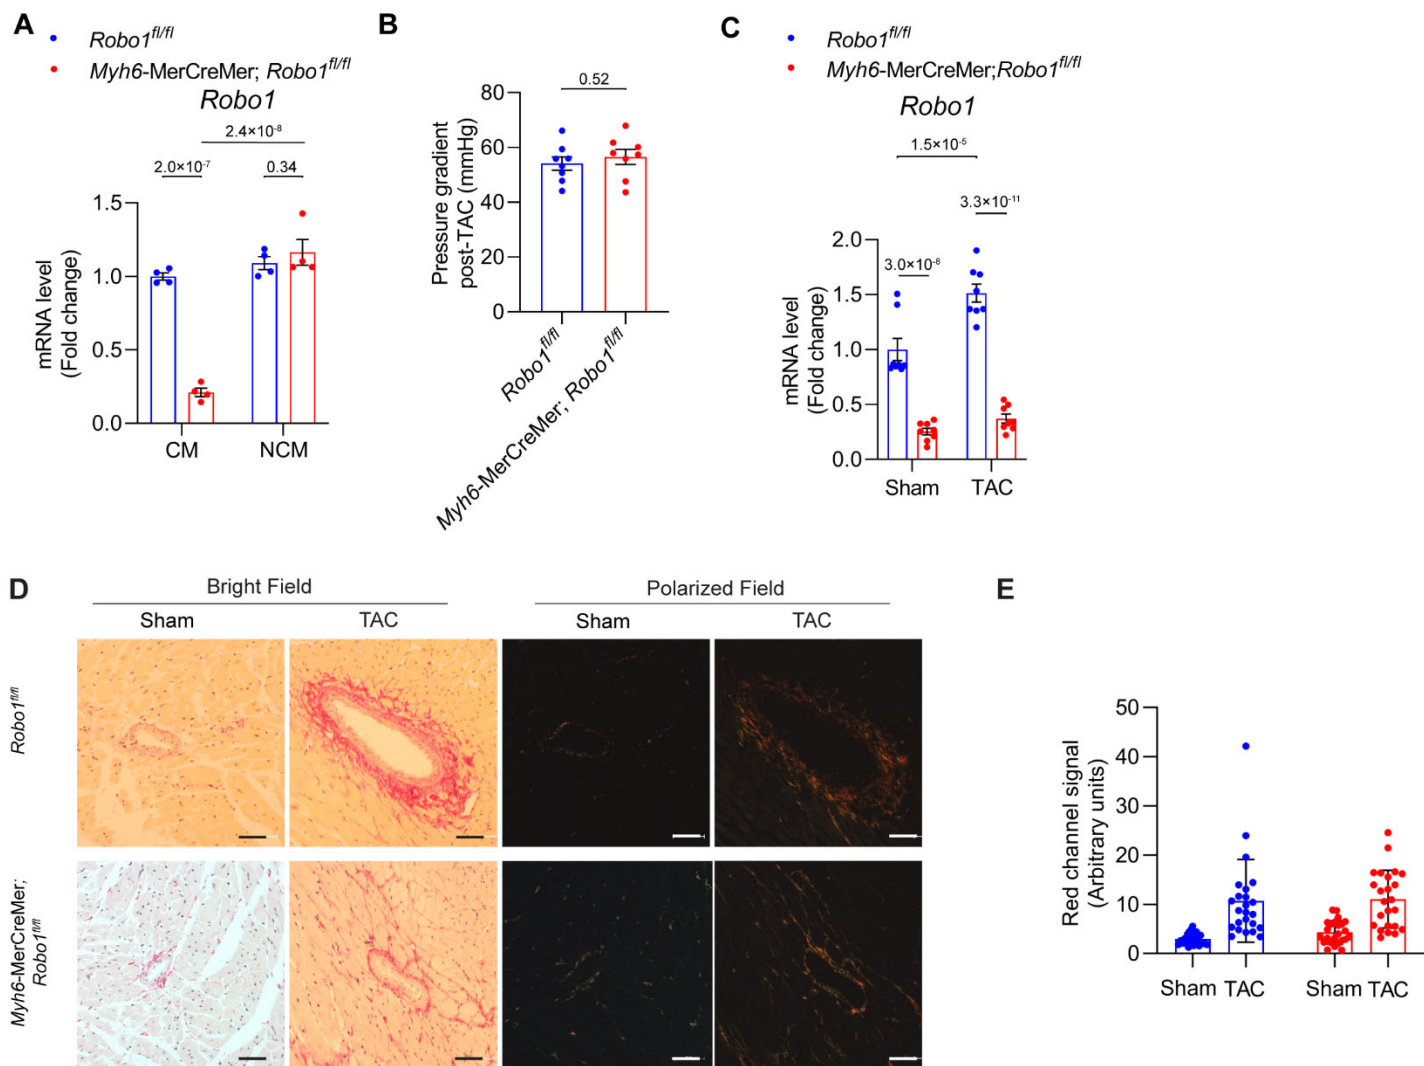

293 **Supplemental Figure 8. A.** qPCR analysis of *Robo1* (normalized to *Gaphd* mRNA) in cardiomyocytes (CM) or  
 294 non-cardiomyocytes (NCM) isolated from *Robo1<sup>fl/fl</sup>* or *Myh6-CreERT<sup>2</sup>; Robo1<sup>fl/fl</sup>* mice, which had been injected  
 295 with tamoxifen 6 weeks prior. Two-way ANOVA with Tukey's multiple comparisons test. N=4 mice/group. **B.** Peak  
 296 pressure gradient of aorta measured by echocardiography 3 day after TAC in *Robo1<sup>fl/fl</sup>* and *Myh6-CreERT<sup>2</sup>;*  
 297 *Robo1<sup>fl/fl</sup>* mice. Student's t-test assuming the application of the Central Limit Theorem. N=8 mice/group. **C.** *Robo1*  
 298 mRNA levels assayed by qPCR in *Robo1<sup>fl/fl</sup>* and *Myh6-CreERT<sup>2</sup>; Robo1<sup>fl/fl</sup>* mice subjected to Sham or TAC  
 299 surgery. Two-way ANOVA with Tukey's multiple comparisons test. **D.** Picosirius red staining of myocardial  
 300 sections from *Robo1<sup>fl/fl</sup>* and *Myh6-MerCreMer;Robo1<sup>fl/fl</sup>* mice after sham or TAC surgery and visualized under  
 301 brightfield microscopy and polarized light. Representative images shown and scale bar = 100 mm. **E.**  
 302 Quantification of red channel signal under polarized light of picosirius red stained myocardial sections from **D.**  
 303 Data from N=3 animals/group with 6-7 high power fields analyzed per animal. A linear regression model with  
 304 cluster option was used to evaluate the data in **E.** The comparison of surgery (Sham vs. TAC) was found to be  
 305 significant ( $p=1.0\times 10^{-4}$ ). The comparison of genotype (*Robo1<sup>fl/fl</sup>* vs. *Myh6-MerCreMer;Robo1<sup>fl/fl</sup>*) and the  
 306 interaction between genotype and surgery both yielded no significant difference ( $p=0.12$  and  $p=0.34$ ,  
 307 respectively).

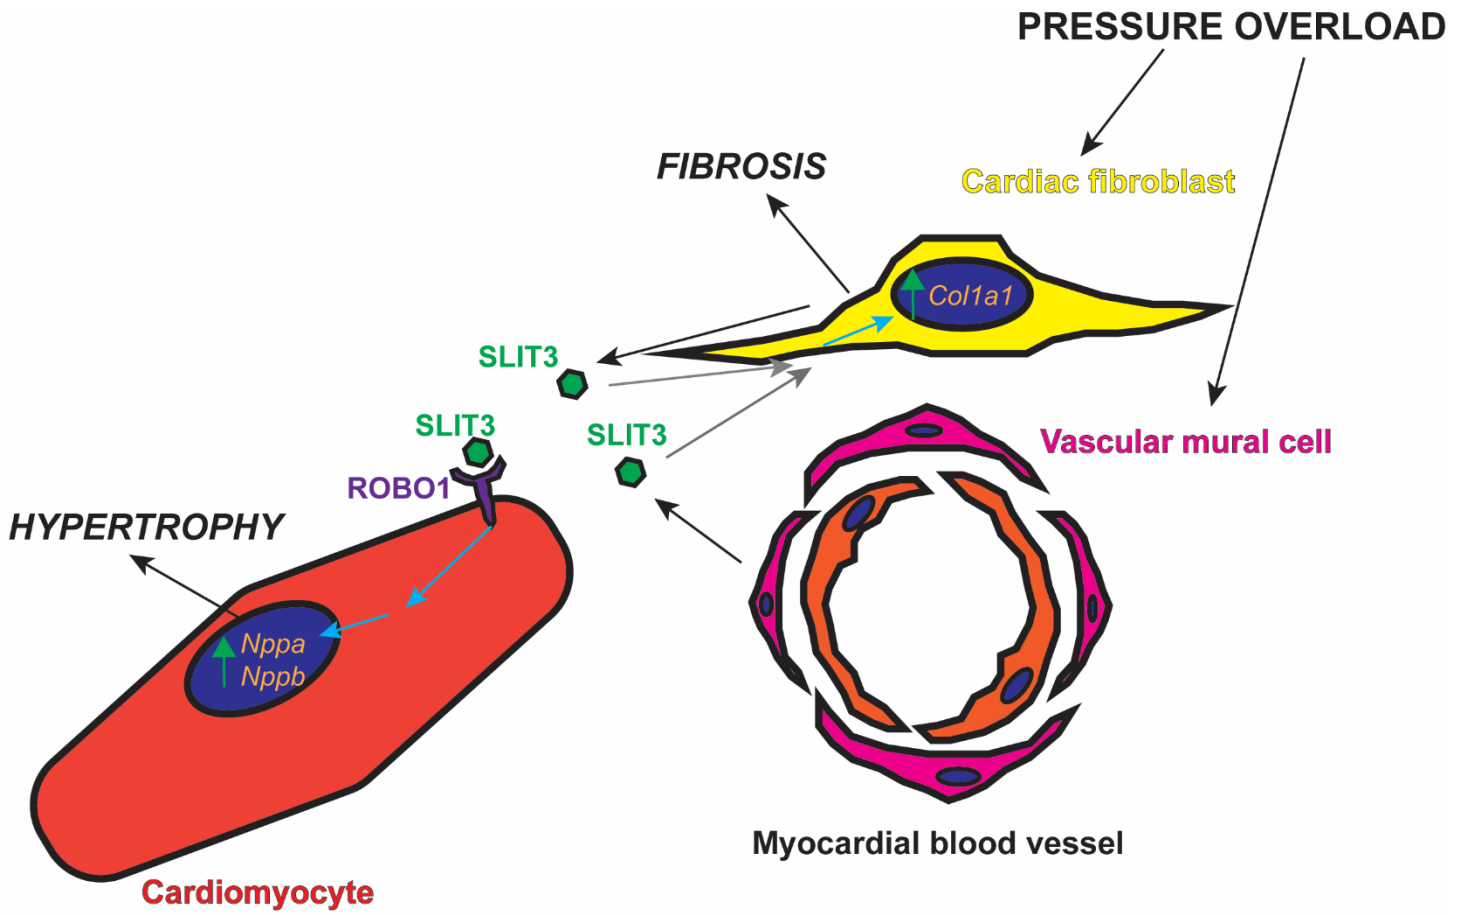

308  
 309 **Supplemental Figure 9.** Summary figure and working model of how SLIT3 signaling stimulates cardiomyocyte  
 310 hypertrophy and cardiac fibrosis in response to pressure overload via a stromal cell:cardiomyocyte and stromal  
 311 cell:cardiac fibroblast axes.  
 312  
 313
