# Supplementary material for: Stromal Cell-SLIT3/Cardiomyocyte-ROBO1 Axis Regulates Pressure Overload-Induced Cardiac Hypertrophy
Source: PubMed Central journal article supplement — Circ Res. 2024 Feb 28;134(7):913–30. doi: 10.1161/CIRCRESAHA.122.321292 (PMC10977056; doi:10.1161/circresaha.122.321292), 2024-02-28
Supplement: res-134-913-s003.pdf [file res-134-913-s003.pdf]

## Major Resources Table

In order to allow validation and replication of experiments, all essential research materials listed in the Methods should be included in the Major Resources Table below. Authors are encouraged to use public repositories for protocols, data, code, and other materials and provide persistent identifiers and/or links to repositories when available. Authors may add or delete rows as needed.

### Animals (in vivo studies)

| Species | Vendor or Source             | Background Strain | Sex | Persistent ID / URL                                                                                                                                                                         |
|---------|------------------------------|-------------------|-----|---------------------------------------------------------------------------------------------------------------------------------------------------------------------------------------------|
| Mouse   | The Jackson Laboratory (Jax) | C57BL/6J          | M/F | <a href="https://www.jax.org/strain/000664">https://www.jax.org/strain/000664</a>                                                                                                           |
| Rat     | Charles River Laboratories   | Sprague Dawley    | M/F | <a href="https://www.criver.com/products-services/find-model/sas-sprague-dawley-rat?region=3611">https://www.criver.com/products-services/find-model/sas-sprague-dawley-rat?region=3611</a> |

### Genetically Modified Animals

|                        | Species | Vendor or Source                              | Background Strain | Other Information             | Persistent ID / URL |
|------------------------|---------|-----------------------------------------------|-------------------|-------------------------------|---------------------|
| <b>Parent - Male</b>   | Mouse   | Jax                                           | C57BL/6J          | <i>Myh6</i> Cre               | Strain #:005657     |
| <b>Parent - Male</b>   | Mouse   | Jax                                           | C57BL/6J          |                               |                     |
| <b>Parent - Female</b> | Mouse   | University of Michigan Transgenic Core        | C57BL/6J          | <i>Robo1</i> <sup>fl/fl</sup> | N/A                 |
| <b>Parent - Male</b>   | Mouse   | University of Michigan Transgenic Core        | C57BL/6J          | <i>Robo1</i> <sup>fl/fl</sup> | N/A                 |
| <b>Parent - Female</b> | Mouse   | Dr. Sean McLean, University of North Carolina | CD1               | <i>Slit3</i> <sup>-/-</sup>   | N/A                 |
| <b>Parent - Male</b>   | Mouse   | Dr. Sean McLean, University of North Carolina | CD1               | <i>Slit3</i> <sup>-/-</sup>   | N/A                 |
| <b>Parent - Male</b>   | Mouse   | Dr. Michelle Tallquist, University of Hawaii  | C57BL/6J          | <i>Tcf21</i> -MerCreMer       | N/A                 |
| <b>Parent - Male</b>   | Mouse   | Dr. Sylvia Evans, UCSD                        | C57BL/6J          | <i>Tbx18</i> -CreERT2         | N/A                 |
| <b>Parent - Male</b>   | Mouse   | Jax                                           | C57BL/6J          | <i>Rosa26</i> -MerCreMer      |                     |
| <b>Parent - Male</b>   | Mouse   | Dr. Sun-Kyeong Lee, University of Connecticut | C57BL/6J          | <i>Slit3</i> <sup>fl/fl</sup> | N/A                 |
| <b>Parent - Male</b>   | mouse   | The Jackson Laboratory                        | C56 BL/6J         | Td Tomato                     | Stock No: 007909    |
| <b>Parent - Female</b> | mouse   | The Jackson Laboratory                        | C56 BL/6J         | Td Tomato                     | Stock No: 007909    |
| <b>Parent - Male</b>   | mouse   | The Jackson Laboratory                        | C56 BL/6J         | R26-CreERT2                   | Stock No: 008463    |

|                                 |       |                                          |           |                            |                  |
|---------------------------------|-------|------------------------------------------|-----------|----------------------------|------------------|
| <b>Parent - Female</b>          | mouse | The Jackson Laboratory                   | C56 BL/6J | R26-CreERT2                | Stock No: 008463 |
| <b>Neonates-Female and male</b> | mouse | Dr. Alexander Jaworski, Brown University | CD1       | <i>Robo1<sup>-/-</sup></i> | N/A              |

### Antibodies

| Target antigen                                                                        | Vendor or Source          | Catalog #  | Working concentration | Lot # (preferred but not required) | Persistent ID / URL |
|---------------------------------------------------------------------------------------|---------------------------|------------|-----------------------|------------------------------------|---------------------|
| SLIT3                                                                                 | Thermo Fisher Scientific  | PA5-104142 | 1:1000                |                                    | PA5-104142          |
| a-actinin                                                                             | abcam                     | Ab68194    | 1:100                 |                                    | Ab68194             |
| ROBO1                                                                                 | abcam                     | Ab256791   | 1:100                 |                                    | Ab256791            |
| cTNT                                                                                  | abcam                     | Ab209813   | 1:100                 |                                    | Ab209813            |
| PDGFRa                                                                                | Cell Signaling Technology | 3174       | 1:100                 |                                    | 3174                |
| Myh11                                                                                 | Thermofisher              | MA5-11971  | 1:100                 |                                    | MA5-11971           |
| NG2                                                                                   | Thermofisher              | PA5-100235 | 1:100                 |                                    | PA5-100235          |
| Goat anti-Mouse IgG2b Cross-Adsorbed Secondary Antibody, Alexa Fluor 488              | ThermoFisher              | A-21141    | 1:100                 |                                    | A-21141             |
| Goat anti-Mouse IgG2b Cross-Adsorbed Secondary Antibody, Alexa Fluor 488              | ThermoFisher              | A-21141    | 1:100                 |                                    | A-21141             |
| Goat anti-rabbit IgG (H+L), F(ab') <sub>2</sub> Fragment (Alexa Fluor® 594 Conjugate) | cell signaling technology | 8889       | 1:100                 |                                    | 8889                |
| goat anti-rabbit IgG (H+L), F(ab') <sub>2</sub> Fragment (Alexa Fluor® 488 Conjugate) | cell signaling technology | 4412       | 1:100                 |                                    | 4412                |
| Alexa Fluor® 488 WGA                                                                  | ThermoFisher              | W11261     | 1:100                 |                                    | W11261              |
| SLIT3                                                                                 | Sigma Aldrich             | SAB2109223 | 1:100                 |                                    | SAB2109223          |
| tdTomato                                                                              | abcam                     | EPR18992   | 1:100                 |                                    | EPR18992            |
|                                                                                       |                           |            |                       |                                    |                     |

## DNA/cDNA Clones

### Cultured Cells

| Name                                              | Vendor or Source                           | Sex (F, M, or unknown) | Persistent ID / URL |
|---------------------------------------------------|--------------------------------------------|------------------------|---------------------|
| iCell iPS-CMs                                     | FUJIFILM Cellular Dynamics, Inc.           |                        | R1105               |
| Mouse cardiac fibroblasts                         | Isolated from C57BL/6J mice                | F and M                |                     |
| Primary human aortic vascular smooth muscle cells | Promocell GmbH                             |                        | C-12533             |
| Neonatal rat cardiomyocytes                       | Isolated from Sprague Dawley neonatal rats | F and M                |                     |

### Other

| Description                         | Source / Repository        | Persistent ID / URL |
|-------------------------------------|----------------------------|---------------------|
| Ad-GFP-h-SLIT3                      | Vector Biolabs             | Cat. No: ADV-223657 |
| Ad-Cre-GFP                          | Vector Biolabs             | Cat. No: 1700       |
| Pierce™ Primary Cell Isolation Kits | Invitrogen                 | Cat. No: 88280      |
| siRNA human <i>SLIT3</i>            | Origene Technologies, Inc. |                     |
| siRNA mouse <i>Robo1</i>            | Origene Technologies, Inc. |                     |
| Ad-GFP                              | Vector Biolabs             | Cat. No: 1060       |

## ARRIVE GUIDELINES

The ARRIVE guidelines (<https://arriveguidelines.org/>) are a checklist of recommendations to improve the reporting of research involving animals. Key elements of the study design should be included below to better enable readers to scrutinize the research adequately, evaluate its methodological rigor, and reproduce the methods or findings.

### Study Design

| Groups                                                  | Sex | Age        | Number (prior to experiment) | Number (after first postop echo) | Littermates (Yes/No) | Other description                                 |
|---------------------------------------------------------|-----|------------|------------------------------|----------------------------------|----------------------|---------------------------------------------------|
| TAC Exp1- <i>Slit3<sup>fl/fl</sup></i>                  | M/F | 8-10 weeks | N=13                         | N=8                              | Yes                  | N=4 surgical death<br>N=1 inadequate TAC gradient |
| TAC Exp1- <i>Rosa26-CreERT2;Slit3<sup>fl/fl</sup></i>   | M/F | 8-10 weeks | N=12                         | N=8                              | Yes                  | N=3 surgical deaths<br>N=1 inadequate gradient    |
| TAC Exp2- <i>Slit3<sup>fl/fl</sup></i>                  | M/F | 8-10 weeks | N=12                         | N=8                              | Yes                  | N=1 inadequate gradient<br>N=3 surgical deaths    |
| TAC Exp2- <i>Tcf21-MerCreMer;Slit3<sup>fl/fl</sup></i>  | M/F | 8-10 weeks | N=12                         | N=8                              | Yes                  | N=3 surgical deaths<br>N=1 inadequate gradient    |
| TAC Exp3- <i>Slit3<sup>fl/fl</sup></i>                  | M/F | 8-10 weeks | N=11                         | N=8                              | Yes                  | N=1 surgical death<br>N=2 inadequate TAC gradient |
| TAC Exp3- <i>Tbx18-CreERT2;Slit3<sup>fl/fl</sup></i>    | M/F | 8-10 weeks | N=10                         | N=8                              | Yes                  | N=1 inadequate gradient<br>N=1 surgical death     |
| Exp4- <i>Slit3<sup>+/+</sup></i>                        | M/F | 7 days     | N=3                          | N=3                              | Yes                  | Planned euthanasia                                |
| Exp4- <i>Slit3<sup>-/-</sup></i>                        | M/F | 7 days     | N=3                          | N=3                              | Yes                  | Planned euthanasia                                |
| Exp5- <i>Robo1<sup>+/+</sup></i>                        | M/F | 7 days     | N=3                          | N=3                              | Yes                  | Planned euthanasia                                |
| Exp5- <i>Robo1<sup>-/-</sup></i>                        | M/F | 7 days     | N=3                          | N=3                              | Yes                  | Planned euthanasia                                |
| TAC Exp6- <i>Robo1<sup>fl/fl</sup></i>                  | M/F | 8-10 weeks | N=10                         | N=8                              | Yes                  | N=1 inadequate TAC gradient<br>N=1 surgical death |
| TAC Exp6- <i>Myh6-MerCreMer;Robo1<sup>fl/fl</sup></i>   | M/F | 8-10 weeks | N=9                          | N=8                              | Yes                  | N=1 surgical death                                |
| Sham Exp1- <i>Slit3<sup>fl/fl</sup></i>                 | M/F | 8-10 weeks | N=8                          | N=8                              | Yes                  |                                                   |
| Sham Exp1- <i>Rosa26-CreERT2;Slit3<sup>fl/fl</sup></i>  | M/F | 8-10 weeks | N=8                          | N=8                              | Yes                  |                                                   |
| Sham Exp2- <i>Slit3<sup>fl/fl</sup></i>                 | M/F | 8-10 weeks | N=8                          | N=8                              | Yes                  |                                                   |
| Sham Exp2- <i>Tcf21-MerCreMer;Slit3<sup>fl/fl</sup></i> | M/F | 8-10 weeks | N=8                          | N=8                              | Yes                  |                                                   |
| Sham Exp3- <i>Slit3<sup>fl/fl</sup></i>                 | M/F | 8-10 weeks | N=8                          | N=8                              | Yes                  |                                                   |

|                                                                      |     |               |     |     |     |  |
|----------------------------------------------------------------------|-----|---------------|-----|-----|-----|--|
| Sham Exp3- <i>Tbx18</i> -<br>CreERT2; <i>Slit3</i> <sup>fl/fl</sup>  | M/F | 8-10<br>weeks | N=8 | N=8 | Yes |  |
| Sham Exp6- <i>Robo1</i> <sup>fl/fl</sup>                             | M/F | 8-10<br>weeks | N=8 | N=8 | Yes |  |
| Sham Exp6- <i>Myh6</i> -<br>MerCreMer; <i>Robo1</i> <sup>fl/fl</sup> | M/F | 8-10<br>weeks | N=8 | N=8 | Yes |  |

**Sample Size:** Please explain how the sample size was decided Please provide details of any a *prior* sample size calculation, if done.

We performed a power analysis to determine the appropriate number of animals in each TAC group. Given our historical measurements (mean±SD) of these outcomes on control animals, our intention to detect a 20% difference between control and experimental groups, a probability of Type I error ( $\alpha$ ) of 0.05, and the risk of Type II error ( $\beta$ ) of 0.2, we have determined the minimum number animals needed for each experiment: n=8 mice/group for HW/BW ratio measurement. Initial group size was at least 11 animals to account for attrition or dropout rate from surgical mortality. Approximately 20% of animals were excluded from the study because of TAC procedure mortality or inadequate TAC gradients.

**Inclusion Criteria** – healthy animals to be considered for surgery. No signs of preoperative distress. Post surgery – no signs of distress, adequate TAC gradient.

**Exclusion Criteria** – TAC gradient <25 mmHg. Signs of distress. Death from surgery.

**Randomization** – Animals were randomized to TAC or Sham procedures by alternating to each group.

**Blinding** – Echocardiograms were performed by a technician who was blinded to the genotype. Cell size and cardiomyocyte cross-sectional area was measured from coded digital images that lacked genotype or group assignment identifiers.
