# Supplementary figures and images for: Stromal Cell-SLIT3/Cardiomyocyte-ROBO1 Axis Regulates Pressure Overload-Induced Cardiac Hypertrophy
Source: PubMed Central journal article supplement — Circ Res. 2024 Feb 28;134(7):913–30. doi: 10.1161/CIRCRESAHA.122.321292 (PMC10977056; doi:10.1161/circresaha.122.321292), 2024-02-28

Supplemental Figure 6G

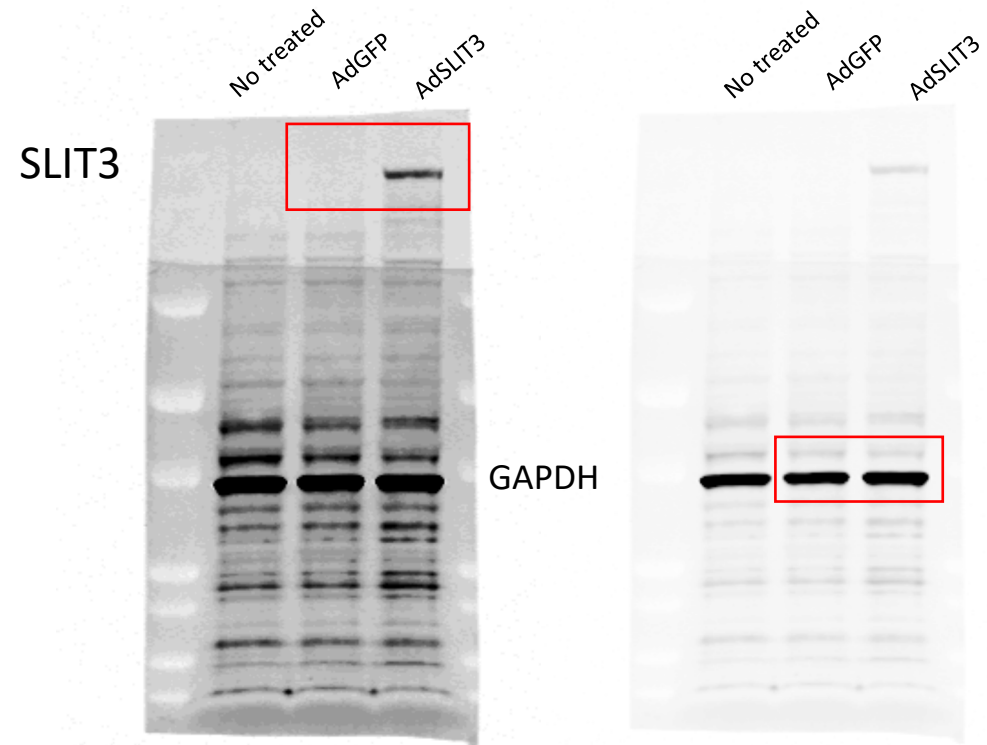

Supplement: res-134-913-s004.pdf [file res-134-913-s004.pdf]
